# Supplementary material for: Effective control of the tomato wilt pathogen using TiO2 nanoparticles as a green nanopesticide
Source: Royal Society of Chemistry journal article supplement (doi:10.1039/d3en00059a), 2023-01-01
Supplement: d3en00059a1.pdf [file d3en00059a1.pdf]

## **Supporting information**

### **Effective Control of the Tomato Wilt Pathogen using TiO<sub>2</sub> Nanoparticles as a Green Nanopesticide**

Xiaohong Pan<sup>a</sup>, Danyue Nie<sup>a</sup>, Xueping Guo<sup>a</sup>, Shanshan Xu<sup>a</sup>, Dingyang Zhang<sup>a</sup>, Fang Cao<sup>a</sup> and Xiong Guan<sup>b,\*</sup>

<sup>a</sup> State Key Laboratory of Ecological Pest Control for Fujian and Taiwan Crops & Key Lab of Biopesticide and Chemical Biology, Ministry of Education & Ministerial and Provincial Joint Innovation Centre for Safety Production of Cross-Strait Crops, College of Plant Protection, Fujian Agriculture and Forestry University, Fuzhou, Fujian 350002, P. R. China.

\*CORRESPONDING AUTHOR

E-mail: [guanxfafu@126.com](mailto:guanxfafu@126.com)

**Table S1** The primers of *phcA*, *phcB*, *phcR*, *epsA*, *epsF*, *egl*, *pilT*, *hrp* and *qRSgyrA* genes

| Gene              | primers ( 5'→3' )        |
|-------------------|--------------------------|
| <i>phcA</i> -F    | GGACATGATCTTCACGGTCAACT  |
| <i>phcA</i> -R    | GACTCATCCTCCTTTTCTGCATC  |
| <i>phcB</i> -F    | CGATTATCTGTCCGACAAGGTATG |
| <i>phcB</i> -R    | CATTCCAGCAGGTGTTCCAT     |
| <i>phcR</i> -F    | GCGGAATACAGCGACATC       |
| <i>phcR</i> -R    | GCTTCTCCAGGATCTTGAA      |
| <i>epsA</i> -F    | AATGTCTACGTGATCCGCCG     |
| <i>epsA</i> -R    | GTACACCACGTCCTTCGGTT     |
| <i>epsF</i> -F    | GCTTTTCGTCGTGGTTTGCT     |
| <i>epsF</i> -R    | GGAAGCCAGCAACAACAGTG     |
| <i>egl</i> -F     | GGAAGCCAGCAACAACAGTG     |
| <i>egl</i> -R     | GGAAGCCAGCAACAACAGTG     |
| <i>pilT</i> -F    | AAGAACAAAGCGTCTGATCTGC   |
| <i>pilT</i> -R    | CTCCAGGTTTTCTTCGTAATGCT  |
| <i>hrp</i> -F     | TGCTTGGGCTTGGCTTCATC     |
| <i>hrp</i> -R     | CATGAGCAAGGACGAAGTCAAG   |
| <i>qRSgyrA</i> -F | CGACTGGAACCGTCCCTAC      |
| <i>qRSgyrA</i> -R | TCCGCACGATGGTGTCATA      |

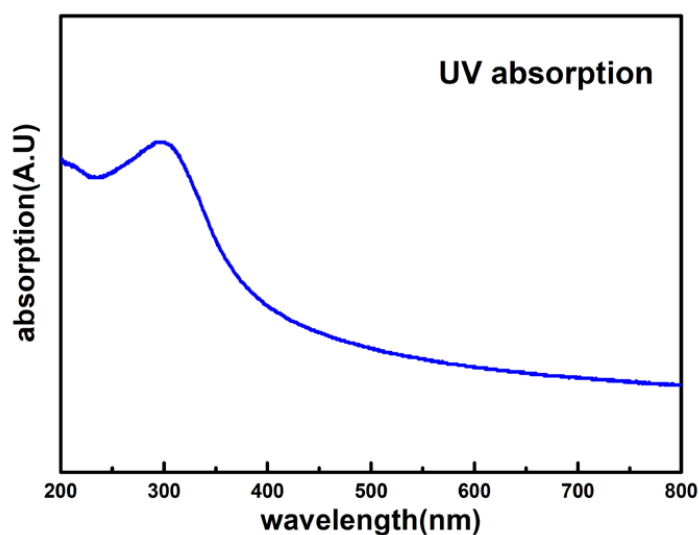

**Figure S1.** The UV-Vis absorption wavelength of TiO<sub>2</sub>

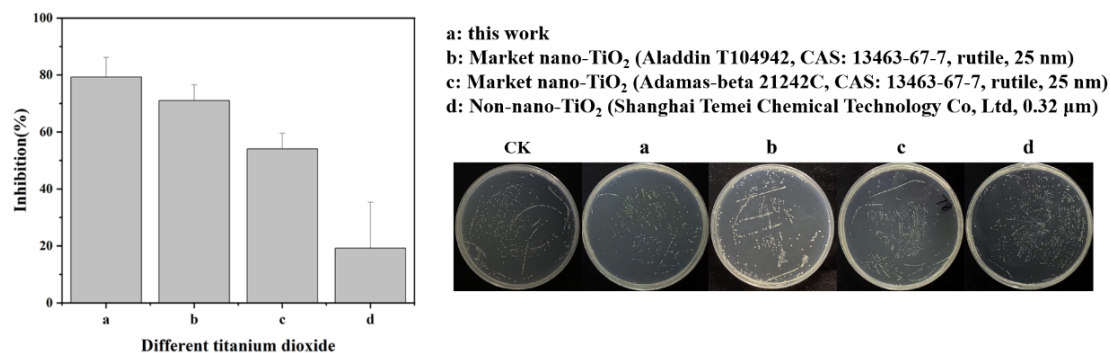

**Figure S2.** Antibacterial effect of 0.05 mg/L TiO<sub>2</sub> NPs comparing with market nano-TiO<sub>2</sub> and non-nano-TiO<sub>2</sub>

**Table S2** The effective concentration comparison for 50% inhibition (EC<sub>50</sub>) and minimum inhibitory concentration (MIC)

| Pesticide                                | Type            | Origin         | EC <sub>50</sub> (mg/L) | MIC (mg/L) | Reference        |
|------------------------------------------|-----------------|----------------|-------------------------|------------|------------------|
| Copper Hydroxide WG                      | Commercial      | Korea          | /                       | 200        | 1                |
| Copper hydroxide + Oxadixyl WP           | Commercial      | Korea          | /                       | 200        | 1                |
| Copper oxychloride + Dithianon WP        | Commercial      | Korea          | /                       | 200        | 1                |
| Copper oxychloride + Kasugamycin WP      | Commercial      | Korea          | /                       | 100        | 1                |
| Streptomycin + Validamycin A WP          | Commercial      | Korea          | /                       | 10         | 1                |
| Oxine copper + Polyoxin B WP             | Commercial      | Korea          | /                       | 10         | 1                |
| Bioxeda                                  | Commercial      | France         | /                       | 210        | 2                |
| Sporatec                                 | Commercial      | U.S.A.         | /                       | 710        | 2                |
| 3% Zhongsheng Mycin WP                   | Commercial      | China          | 1.31                    | /          | 3                |
| 20%Thiasen Copper SC                     | Commercial      | China          | 20.45                   | /          | 3                |
| 72% Agricultural Streptomycin Sulfate WP | Commercial      | China          | 5.20                    | /          | 3                |
| 53% Suinoline Copper WP                  | Commercial      | China          | 42.14                   | /          | 3                |
| 80% Mancozeb WP                          | Commercial      | China          | 745.60                  | /          | 3                |
| 20% Conazole WP                          | Commercial      | China          | 51.96                   | /          | 3                |
| 1.5% Thiamezole EW                       | Commercial      | China          | 108.99                  | /          | 3                |
| 57.6% Cupric Hydroxide GF                | Commercial      | China          | 120.88                  | /          | 3                |
| 0.5% Chitooligosaccharace AS             | Commercial      | China          | 2.18                    | /          | 3                |
| Caffeic acid phenethyl ester             | Commercial      | China          | 285                     | /          | 4                |
| Magnesium Oxide NPs                      | Commercial      | China          | /                       | 200        | 5                |
| <b>TiO<sub>2</sub> NPs</b>               | <b>Research</b> | <b>Our lab</b> | <b>60</b>               | <b>240</b> | <b>This work</b> |

**Table S3** The Zeta potential of *R. solanacearum* and TiO<sub>2</sub>

| Samples                | Zeta potential (mV) |
|------------------------|---------------------|
| <i>R. solanacearum</i> | -60.55±5.39         |
| TiO <sub>2</sub>       | 40.11±3.15          |

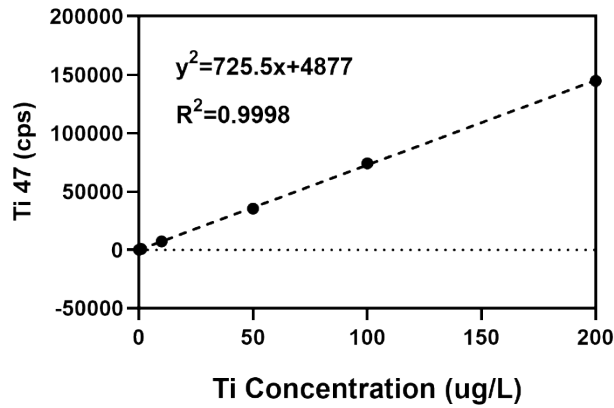

**Figure S3.** The standard curve of TiO<sub>2</sub> by ICP-MS analysis

**Table S4** The quantitative distribution of spraying TiO<sub>2</sub> NPs in tomato plants by ICP-MS

| Plant tissues | Content (Mean ± SD) (mg/kg) | RSD (%) |
|---------------|-----------------------------|---------|
| Mature leaves | 8.9 ± 0.22                  | 3.13    |
| Sprayed leaf  | 19.9 ± 0.45                 | 2.35    |
| Young leaves  | 10.2 ± 0.51                 | 1.61    |
| Roots         | 6.8 ± 0.33                  | 1.53    |
| Stem          | 12.6 ± 0.42                 | 1.77    |

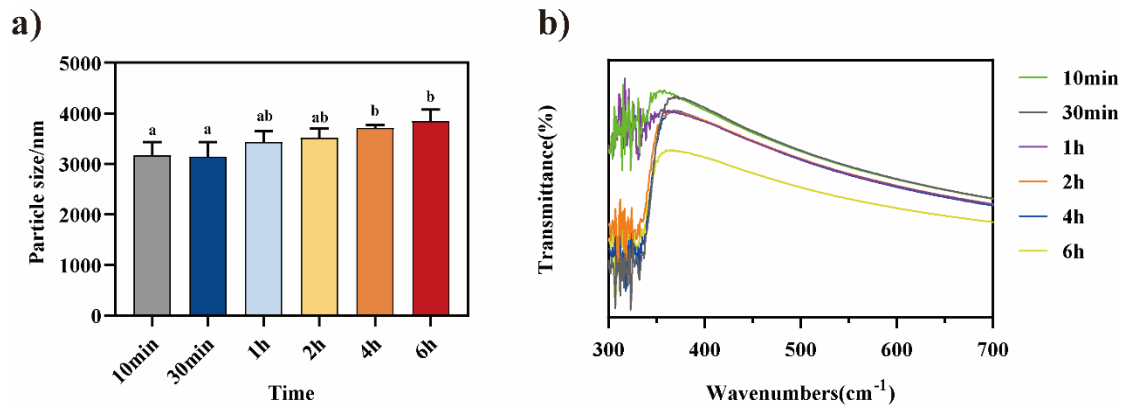

**Figure S4.** a) and b) are average particle size and UV-Vis absorption spectroscopy of TiO<sub>2</sub> NPs dispersed in xylem and phloem sap for 10 min, 30 min, 1 h, 2 h, 4 h and 6 h, respectively.

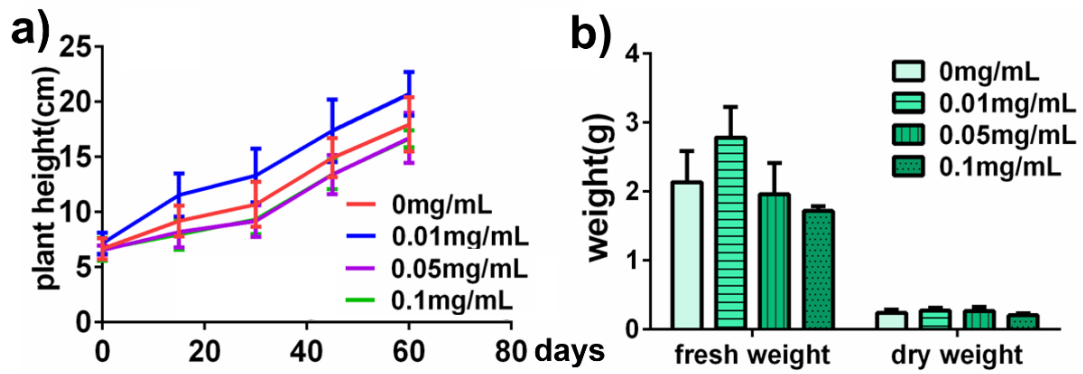

**Figure S5.** a) Effect of different concentrations of rutile on tomato height; b) Effect of different concentrations of rutile on tomato fresh weight and dry weight

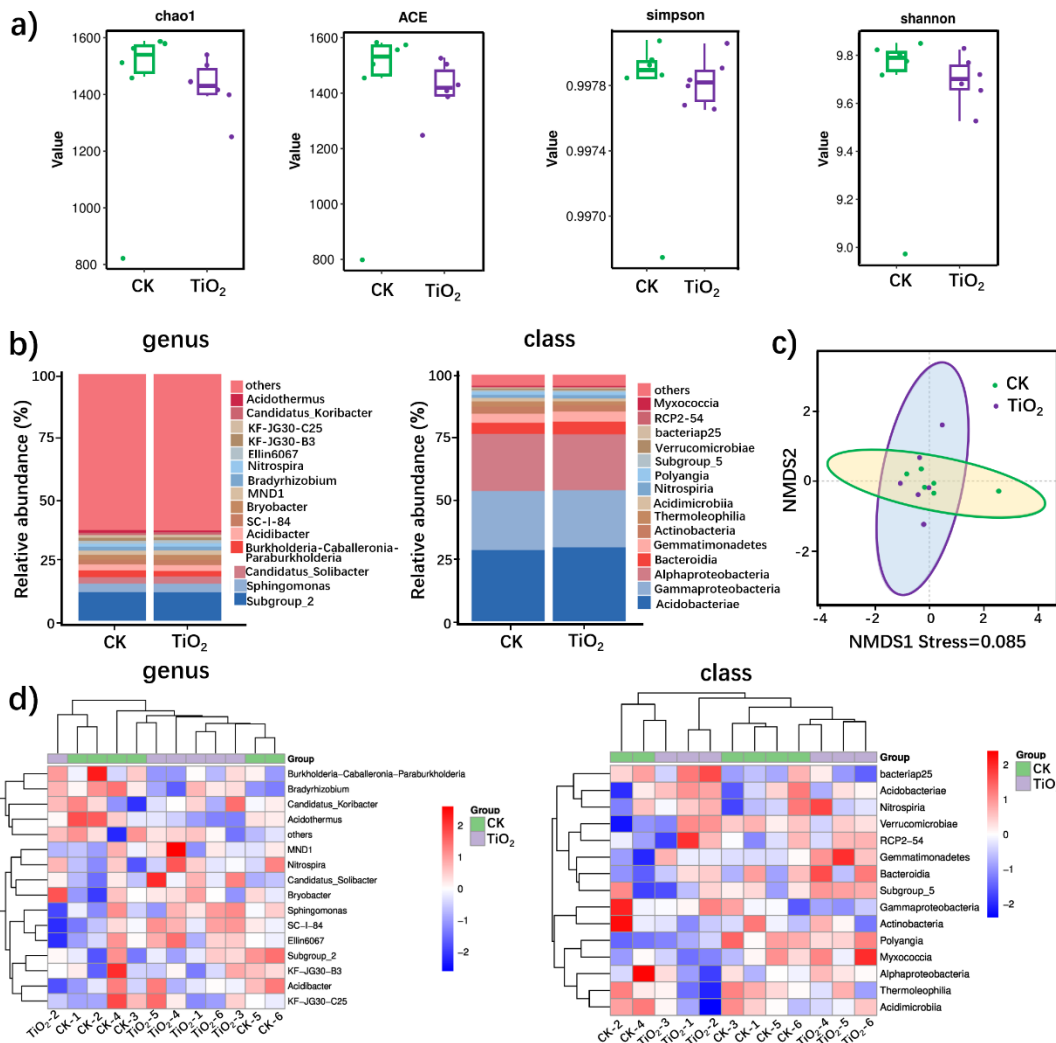

**Figure S6.** Effect of TiO<sub>2</sub> NPs on the soil bacterial community. (a) Chao1, ACE, simpson and shannon indexes; (b) the bacterial community abundance at the genus and

class level after treating with or without TiO<sub>2</sub> NPs; (c) NMDS analysis; (d) Hierarchically clustered heatmaps of top 15 dominant bacterial community abundance at class and genus level, respectively. Abbreviations: Soil only treated with the distilled water (CK), soil treated with TiO<sub>2</sub> NPs suspension (TiO<sub>2</sub>).

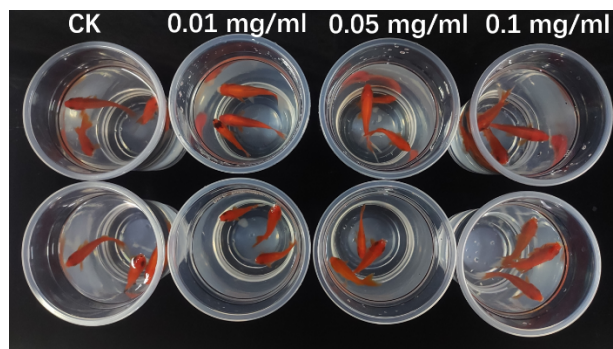

**Figure S7.** The biosafety evaluation of nano-TiO<sub>2</sub> toward non-target organism goldfish

## References

- [1] Lee Y. H., Choi C. W., Kim S. H., *et al.*, Chemical pesticides and plant essential oils for disease control of tomato bacterial wilt. *The plant pathology journal*, 2012, 28(1):32-39.
- [2] La Torre, A., Caradonia, F., Matere, A. *et al.*, Using plant essential oils to control Fusarium wilt in tomato plants[J]. *European Journal of Plant Pathology*, 2016, 144, 487-496.
- [3] Wang. Y., Yin X. H., Wang M., *et al.*, The Antibacterial Activity of Several Fungicides to *Ralstonia solanacearum*. *Journal of Mountain Agriculture and Biology*, 2014, 33(3): 8-12.
- [4] Wang J. Z., Yan C. H., Zhang X. R., *et al.*, A novel nanoparticle loaded with methyl caffeate and caffeic acid phenethyl ester against *Ralstonia solanacearum*—a plant pathogenic bacteria. *RSC Advances*, 2020, 10, 3978-3990.
- [5] Cai L., Chen J., Liu Z, *et al.*, Magnesium Oxide Nanoparticles: Effective agricultural antibacterial agent against *Ralstonia solanacearum*. *Frontiers in Microbiology*, 2018, 9: 790.
